# Supplementary material
Source: ML conference proceedings conference paper supplement (https://openreview.net/forum?id=Z0s5T89qfjc)

## **A Supplementary Materials for ENS-10: A Dataset For Post-Processing Ensemble Weather Forecasts**

### **A.1 ENS-10 Data Ranges**

Here we plot data ranges for all surface (Table 3) and vertical (Table 4) variables at all lead times and pressure levels.

Table 3: ENS-10 surface variables at all lead times.

| Variable                    | Forecast min, mean, max (1998–2015)                                                           |                                                                                              |                                                                                            |
|-----------------------------|-----------------------------------------------------------------------------------------------|----------------------------------------------------------------------------------------------|--------------------------------------------------------------------------------------------|
|                             | 0 h                                                                                           | 24 h                                                                                         | 48 h                                                                                       |
| Sea surface temperature     | <br>29.5   | <br>29.5   | <br>29.5   |
| Total column water          | <br>25.5   | <br>25.5   | <br>25.5   |
| Total column water vapour   | <br>2.5    | <br>2.5    | <br>2.5    |
| Convective precipitation    | <br>0.0003 | <br>0.0003 | <br>0.0003 |
| Mean sea level pressure     | <br>915.0  | <br>915.0  | <br>915.0  |
| Total cloud cover           | <br>0.02   | <br>0.02   | <br>0.02   |
| 10 m U wind component       | <br>-10.0  | <br>-10.0  | <br>-10.0  |
| 10 m V wind component       | <br>-10.0  | <br>-10.0  | <br>-10.0  |
| 2 m temperature             | <br>29.5   | <br>29.5   | <br>29.5   |
| Total precipitation         | <br>0.0003 | <br>0.0003 | <br>0.0003 |
| Skin temperature at surface | <br>29.5 | <br>29.5 | <br>29.5 |

Table 4: ENS-10 vertical variables at all lead times and pressure levels.

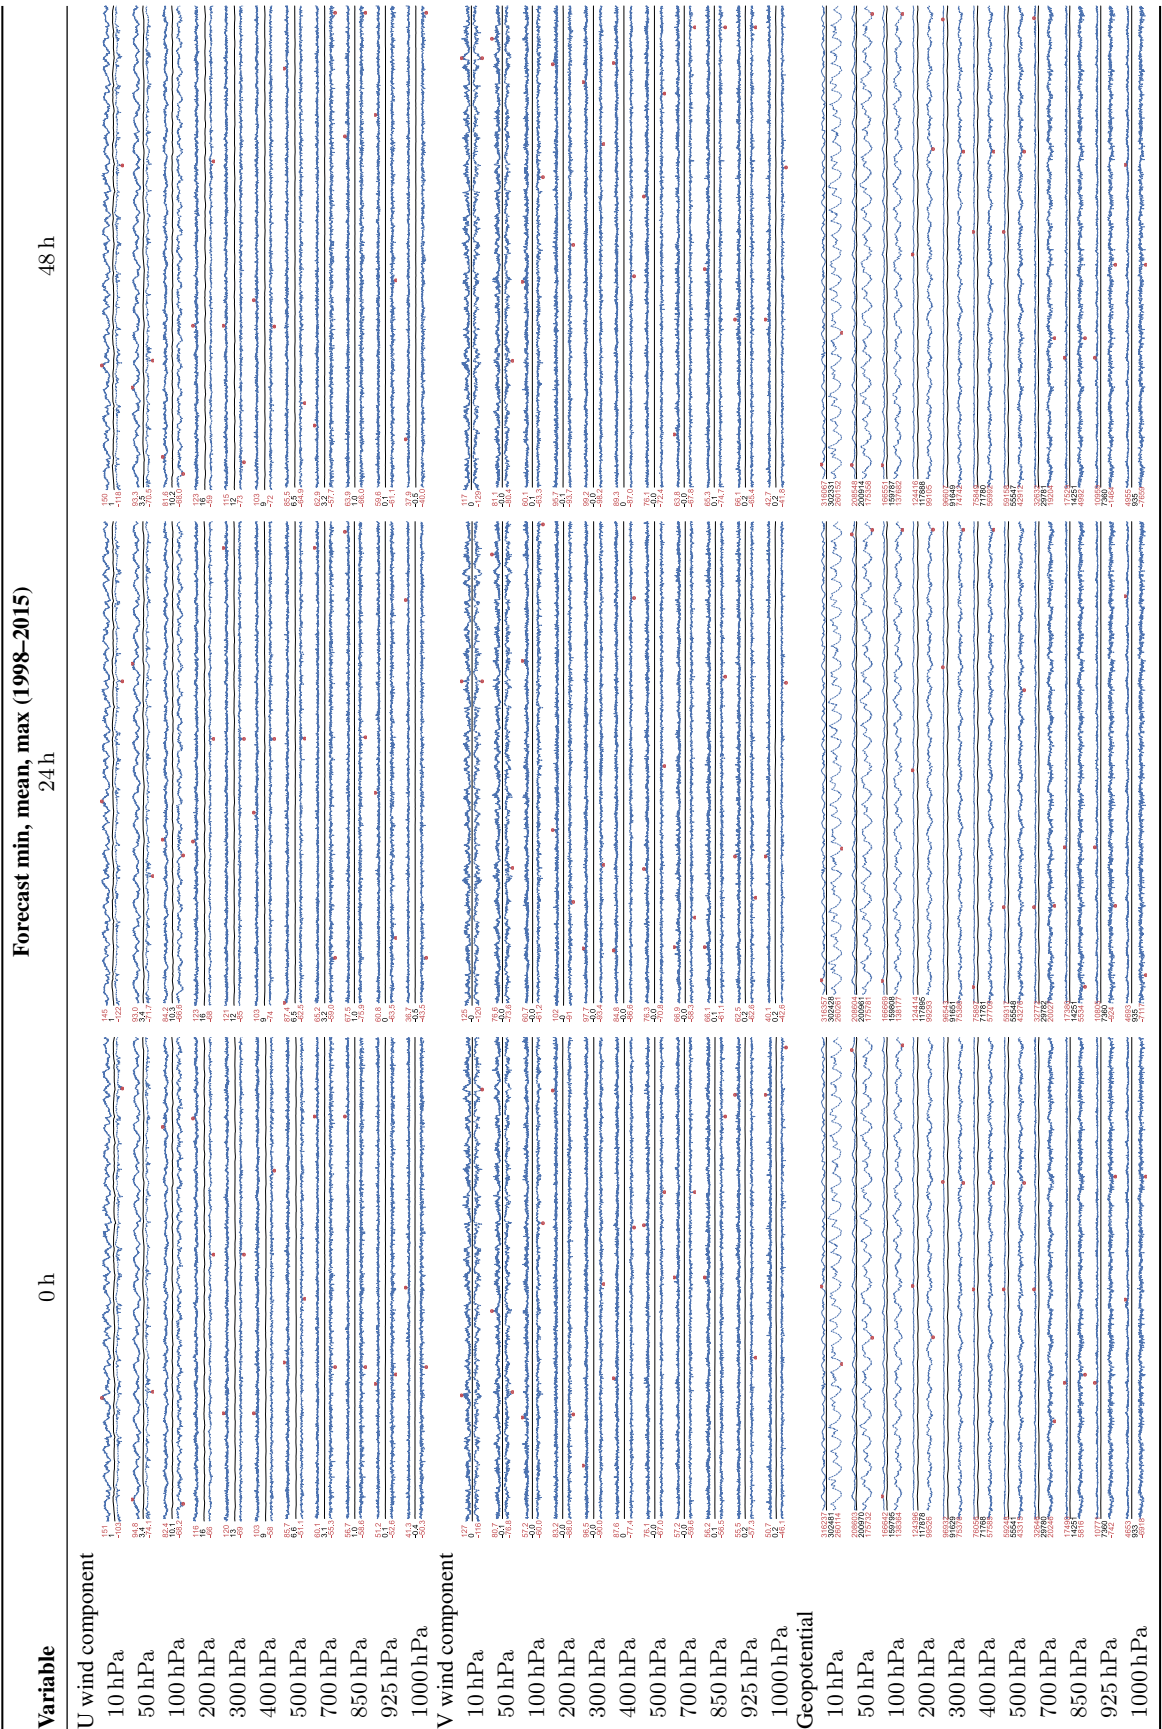

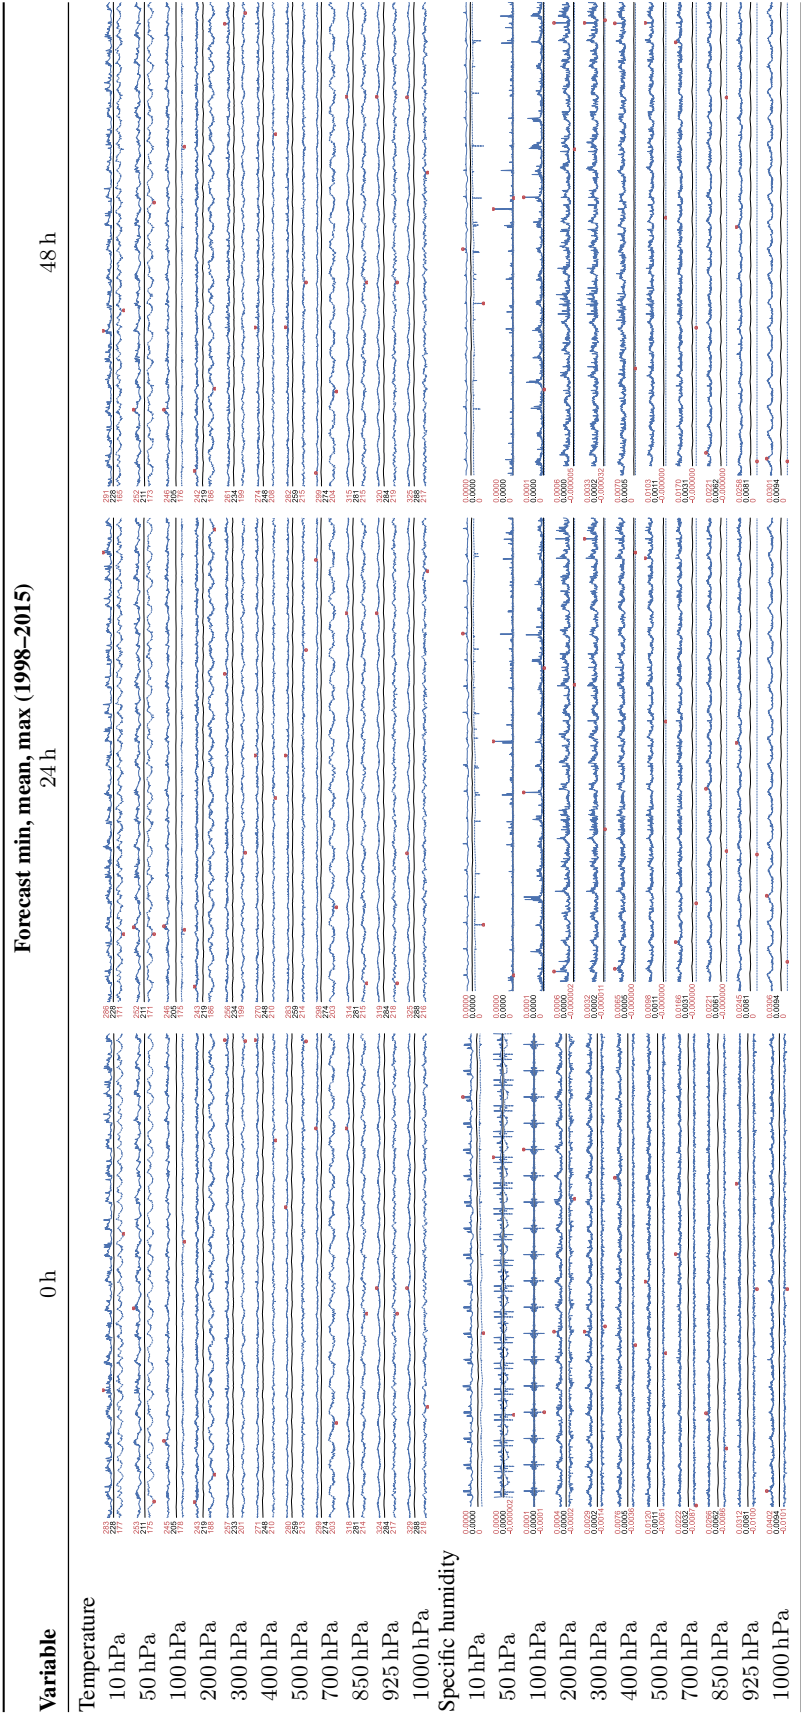

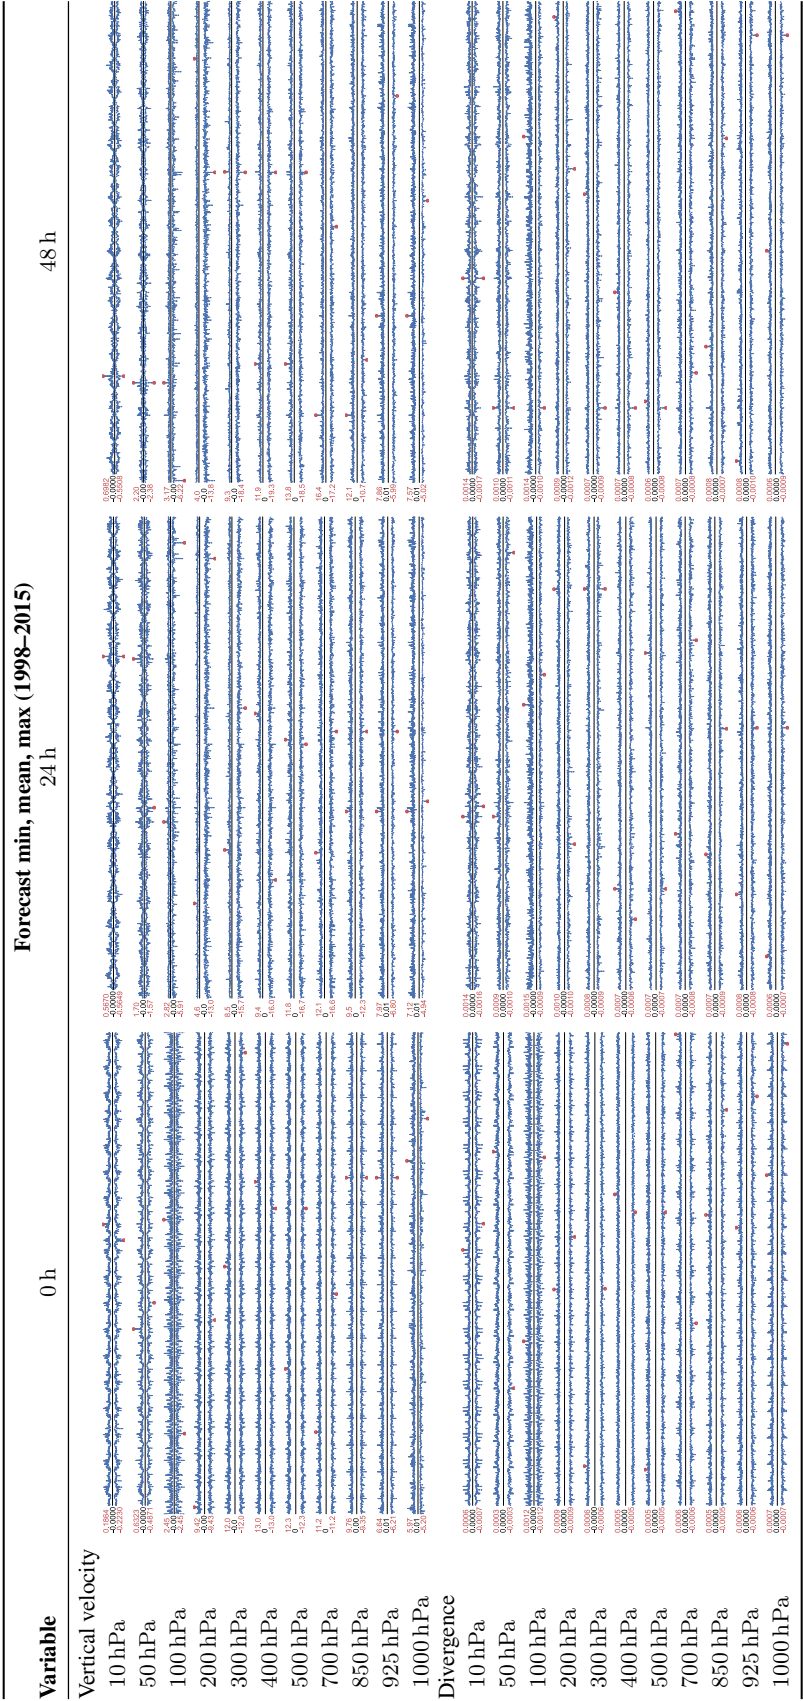

Supplement: supplementary_material [file attachment]
